# Supplementary material
Source: PubMed Central journal article supplement (PMC7362362)
Supplement: advancesADV2019001266-suppl1.pdf [file advancesADV2019001266-suppl1.pdf]

## **Supplement Table Legend**

Table S1. Baseline characteristics in AML patients receiving FM, FB RIC regimen for allogeneic HCT (CR cohort)

Table S2. Adjusted probabilities for outcomes in the CR cohort

Table S3. Multivariate analysis for outcomes (FM vs FB) in the full cohort

Table S4. Multivariate analysis for outcomes (FM vs FB) in the CR cohort

Table S5. Multivariate analysis for outcomes (FM vs FB) in CR cohort adjusted for HCT-CI

Table S6. Transplant outcomes in AML patients receiving FM, FB RIC for allogeneic HCT from identical sibling or well matched unrelated donor

Table S7. Neutrophil and platelet engraftment in AML patients receiving FM, FB RIC regimen

Table S8. Cause of Death

## Supplement Tables

Table S1.

|                                    | FM         | FB         | <i>p</i> -value |
|------------------------------------|------------|------------|-----------------|
| <b>Patient-related</b>             |            |            |                 |
| Number of patients                 | 384        | 627        |                 |
| Number of Centers                  | 63         | 73         |                 |
| Age at transplant                  |            |            |                 |
| Median (range)                     | 59 (19-76) | 61 (18-76) | <0.001          |
| Gender, male (%)                   | 226 (59)   | 355 (57)   | 0.49            |
| Karnofsky score (%)                |            |            | 0.71            |
| < 90                               | 158 (43)   | 247 (41)   |                 |
| ≥90                                | 213 (57)   | 350 (59)   |                 |
| <b>Disease status prior to HCT</b> |            |            |                 |
| MRD status prior to transplant (%) |            |            | <0.001          |
| Negative                           | 127 (34)   | 256 (43)   |                 |
| Positive                           | 40 (11)    | 63 (11)    |                 |
| Not in CR1                         | 39 (10)    | 86 (15)    |                 |
| NA prior 2007                      | 171 (45)   | 185 (31)   |                 |
| Cytogenetic score (%)              |            |            | 0.82            |
| Favorable                          | 22 (6)     | 36 (6)     |                 |
| Intermediate                       | 204 (58)   | 354 (60)   |                 |
| Poor                               | 126 (36)   | 200 (34)   |                 |
| Therapy related/secondary AML (%)  |            |            | 0.03            |
| No                                 | 320 (84)   | 552 (89)   |                 |
| Yes                                | 59 (16)    | 67 (11)    |                 |
| <b>Transplant-related</b>          |            |            |                 |
| Donor type                         |            |            |                 |
| HLA-identical sibling              | 89 (23)    | 203 (32)   |                 |
| Well-matched unrelated (8/8)       | 200 (52)   | 334 (53)   |                 |
| Partially-matched unrelated (7/8)  | 71 (19)    | 66 (11)    |                 |
| Mismatched unrelated (≤6/8)        | 8 (2)      | 4 (<1)     |                 |
| Donor age at HCT (for URD only)    |            |            |                 |
| Median (range)                     | 34 (19-60) | 31 (18-61) | 0.008           |
| GVHD prophylaxis (%)               |            |            | <0.001          |
| TAC-based + MTX                    | 137 (37)   | 407 (66)   |                 |
| TAC-based + MMF                    | 83 (22)    | 117 (19)   |                 |
| CSA-based + MTX                    | 39 (11)    | 11 (2)     |                 |
| CSA-based + MMF                    | 40 (11)    | 23 (4)     |                 |
| ATG/Alemtuzumab use (%)            | 151 (39)   | 326 (52)   | <0.001          |
| Graft type                         |            |            | <0.001          |

|                                  | FM         | FB         | <i>p</i> -value |
|----------------------------------|------------|------------|-----------------|
| Bone marrow                      | 71 (19)    | 54 (9)     |                 |
| Peripheral blood                 | 313 (82)   | 573 (91)   |                 |
| Year of transplant               |            |            | <0.001          |
| 2001-2005                        | 93 (24)    | 70 (11)    |                 |
| 2006-2015                        | 291 (75)   | 557 (89)   |                 |
| Median Follow-up (months, range) | 77 (6-168) | 72 (6-169) |                 |

Table S2.

|         | FM<br>(%)   | FB<br>(%)   | p-value |
|---------|-------------|-------------|---------|
| OS      |             |             |         |
| 1yr     | 58 (53-62)% | 58 (54-61)% | 0.99    |
| 3yr     | 41 (37-46)% | 37 (33-40)% | 0.12    |
| 5yr     | 35 (30-40)% | 31 (28-35)% | 0.24    |
| LFS     |             |             |         |
| 1yr     | 48 (44-53)% | 44 (40-47)% | 0.13    |
| 3yr     | 35 (30-40)% | 29 (26-33)% | 0.06    |
| 5yr     | 28 (24-33)% | 25 (22-28)% | 0.24    |
| Relapse |             |             |         |
| 1yr     | 24 (19-28)% | 44 (41-48)% | <0.001* |
| 3yr     | 33 (28-37)% | 52 (48-56)% | <0.001* |
| 5yr     | 36 (31-40)% | 55 (51-59)% | <0.001* |
| NRM     |             |             |         |
| 1yr     | 28 (23-32)% | 12 (9-14)%  | <0.001* |
| 3yr     | 32 (28-37)% | 19 (16-22)% | <0.001* |
| 5yr     | 36 (31-41)% | 21 (17-24)% | <0.001* |

\* Significant *p*-value;

HR: Hazard ratio; OS: overall survival; LFS: Leukemia-free survival; NRM: non-relapse mortality.

Table S3.

|                                   | <b>N</b> | <b>HR (95% CI)</b> | <b>p-value</b> |
|-----------------------------------|----------|--------------------|----------------|
| <b>OS</b>                         |          |                    |                |
| FM vs. FB ≤3 months               |          | 1.82 (1.36-2.45)   | < 0.001        |
| FM vs. FB >3 months               |          | 0.87 (0.76-1.00)   | 0.05           |
| Age                               |          |                    | < 0.001        |
| 18-39                             | 127      | Reference          |                |
| 40-59                             | 560      | 1.49 (1.16-1.91)   | 0.002          |
| 60-69                             | 645      | 1.66 (1.29-2.13)   | < 0.001        |
| ≥70                               | 81       | 2.07 (1.47-2.90)   | < 0.001        |
| KPS                               |          |                    | 0.02           |
| <90                               | 626      | Reference          |                |
| ≥90                               | 727      | 0.83 (0.73-0.95)   | 0.005          |
| Secondary/t-AML                   |          |                    | 0.03           |
| No                                | 1222     | Reference          |                |
| Yes                               | 163      | 1.26 (1.05-1.52)   | 0.01           |
| Cytogenetics                      |          |                    | < 0.001        |
| Favorable                         | 86       | Reference          |                |
| Intermediate                      | 749      | 1.48 (1.08-2.02)   | 0.01           |
| Poor                              | 465      | 2.02 (1.47-2.79)   | < 0.001        |
| Disease status                    |          |                    | < 0.001        |
| CR1                               | 769      | Reference          |                |
| ≥CR2                              | 273      | 1.11 (0.93-1.32)   | 0.24           |
| PIF/Rel                           | 369      | 1.56 (1.34-1.80)   | < 0.001        |
| Donor                             |          |                    | 0.002          |
| HLA-identical sibling (8/8)       | 371      | Reference          |                |
| Other related                     | 31       | 0.93 (0.59-1.48)   | 0.77           |
| Well-matched unrelated (8/8)      | 762      | 1.17 (1.01-1.37)   | 0.04           |
| Partially-matched unrelated (7/8) | 210      | 1.45 (1.19-1.77)   | < 0.001        |
| Mismatched unrelated (≤6/8)       | 23       | 1.84 (1.17-2.89)   | 0.008          |
| <b>LFS</b>                        |          |                    |                |
| Main effect                       |          |                    | 0.05           |
| FB                                | 788      | Reference          |                |
| FM                                | 617      | 0.89 (0.78-1.00)   | 0.05           |
| KPS                               |          |                    | 0.006          |
| <90                               | 622      | Reference          |                |
| ≥90                               | 723      | 0.82 (0.73-0.93)   | 0.001          |
| Secondary/t-AML                   |          |                    | 0.002          |
| No                                | 1216     | Reference          |                |
| Yes                               | 161      | 1.36 (1.13-1.63)   | < 0.001        |
| Cytogenetics                      |          |                    | < 0.001        |
| Favorable                         | 86       | Reference          |                |
| Intermediate                      | 744      | 1.36 (1.02-1.81)   | 0.04           |
| Poor                              | 462      | 1.90 (1.41-2.55)   | < 0.001        |

|                                   | <b>N</b> | <b>HR (95% CI)</b> | <b>p-value</b> |
|-----------------------------------|----------|--------------------|----------------|
| Disease status                    |          |                    | < 0.001        |
| CR1                               | 764      | Reference          |                |
| ≥CR2                              | 272      | 1.20 (1.02-1.42)   | 0.03           |
| PIF/Rel                           | 367      | 1.79 (1.56-2.07)   | < 0.001        |
| Donor                             |          |                    | 0.002          |
| HLA-identical sibling (8/8)       | 370      | Reference          |                |
| Other related                     | 31       | 0.85 (0.54-1.32)   | 0.46           |
| Well-matched unrelated (8/8)      | 758      | 1.17 (1.01-1.35)   | 0.04           |
| Partially-matched unrelated (7/8) | 207      | 1.30 (1.07-1.58)   | 0.007          |
| Mismatched unrelated (≤6/8)       | 23       | 2.20 (1.42-3.40)   | < 0.001        |
| <b>Relapse</b>                    |          |                    |                |
| Main effect                       |          |                    | < 0.001        |
| FB                                | 788      | Reference          |                |
| FM                                | 617      | 0.65 (0.55-0.76)   | < 0.001        |
| Age                               |          |                    | 0.02           |
| 18-39                             | 127      | Reference          |                |
| 40-59                             | 557      | 1.22 (0.92-1.61)   | 0.16           |
| 60-69                             | 641      | 0.96 (0.72-1.27)   | 0.75           |
| ≥70                               | 80       | 0.97 (0.64-1.47)   | 0.88           |
| KPS                               |          |                    | 0.02           |
| <90                               | 622      | Reference          |                |
| ≥90                               | 723      | 0.81 (0.69-0.94)   | 0.006          |
| Secondary/t-AML                   |          |                    | 0.01           |
| No                                | 1216     | Reference          |                |
| Yes                               | 161      | 1.39 (1.12-1.74)   | 0.003          |
| Cytogenetics                      |          |                    | < 0.001        |
| Favorable                         | 86       | Reference          |                |
| Intermediate                      | 744      | 1.39 (0.97-2.00)   | 0.07           |
| Poor                              | 462      | 2.19 (1.51-3.18)   | < 0.001        |
| Disease status                    |          |                    | < 0.001        |
| CR1                               | 764      | Reference          |                |
| ≥CR2                              | 272      | 1.44 (1.18-1.77)   | < 0.001        |
| PIF/Rel                           | 367      | 2.15 (1.80-2.57)   | < 0.001        |
| Donor                             |          |                    | 0.04           |
| HLA-identical sibling (8/8)       | 370      | Reference          |                |
| Other related                     | 31       | 0.59 (0.32-1.08)   | 0.09           |
| Well-matched unrelated (8/8)      | 758      | 0.97 (0.82-1.16)   | 0.76           |
| Partially-matched unrelated (7/8) | 207      | 0.79 (0.61-1.02)   | 0.08           |
| Mismatched unrelated (≤6/8)       | 23       | 1.81 (1.05-3.13)   | 0.03           |
| <b>NRM</b>                        |          |                    |                |
| FM vs. FB ≤3 months               |          | 3.85 (2.46-6.03)   | < 0.001        |
| FM vs. FB >3 months               |          | 1.14 (0.88-1.47)   | 0.32           |

|                                            | N   | HR (95% CI)      | p-value |
|--------------------------------------------|-----|------------------|---------|
| Age                                        |     |                  | < 0.001 |
| 18-39                                      | 127 | Reference        |         |
| 40-59                                      | 557 | 1.30 (0.86-1.98) | 0.22    |
| 60-69                                      | 641 | 1.76 (1.16-2.66) | 0.008   |
| ≥70                                        | 80  | 2.78 (1.62-4.76) | < 0.001 |
| Disease status                             |     |                  | 0.03    |
| CR1                                        | 764 | Reference        |         |
| ≥CR2                                       | 272 | 0.84 (0.63-1.12) | 0.24    |
| PIF/Rel                                    | 367 | 1.31 (1.03-1.67) | 0.03    |
| Donor                                      |     |                  | < 0.001 |
| HLA-identical sibling (8/8)                | 370 | Reference        |         |
| Other related                              | 31  | 1.46 (0.73-2.92) | 0.28    |
| Well-matched unrelated (8/8)               | 758 | 2.08 (1.54-2.82) | < 0.001 |
| Partially-matched unrelated (7/8)          | 207 | 3.44 (2.42-4.88) | < 0.001 |
| Mismatched unrelated (≤6/8)                | 23  | 3.28 (1.52-7.07) | 0.002   |
| Year of HCT                                |     |                  | 0.02    |
| 2001-2005                                  | 276 | Reference        |         |
| 2006-2010                                  | 634 | 1.26 (0.93-1.70) | 0.13    |
| 2011-2015                                  | 495 | 1.57 (1.13-2.18) | 0.007   |
| GVHD prophylaxis                           |     |                  | 0.003   |
| TAC-based + MMF                            | 287 | Reference        |         |
| TAC-based + MTX                            | 728 | 0.75 (0.58-0.97) | 0.03    |
| TAC +/- Others (not MMF or MTX)            | 147 | 0.60 (0.40-0.92) | 0.02    |
| CSA-based + MMF                            | 101 | 1.08 (0.73-1.59) | 0.71    |
| CSA-based + MTX                            | 66  | 0.86 (0.53-1.38) | 0.53    |
| CSA +/- Others (not MMF or MTX)            | 25  | 1.16 (0.55-2.44) | 0.70    |
| D-R sex match                              |     |                  | 0.005   |
| M-M                                        | 543 | Reference        |         |
| M-F                                        | 365 | 0.87 (0.66-1.14) | 0.32    |
| F-M                                        | 252 | 1.40 (1.08-1.83) | 0.01    |
| F-F                                        | 241 | 0.98 (0.72-1.32) | 0.87    |
| In-vivo T-cell depletion (ATG/Alemtuzumab) |     |                  | 0.02    |
| No                                         | 739 | Reference        |         |
| Yes                                        | 666 | 0.78 (0.63-0.97) | 0.02    |

#### **aGVHD II-IV**

|                                 |     |                  |         |
|---------------------------------|-----|------------------|---------|
| Main effect                     |     |                  | 0.002   |
| FB                              | 784 | Reference        |         |
| FM                              | 610 | 1.35 (1.12-1.62) | 0.002   |
| GVHD prophylaxis                |     |                  | < 0.001 |
| TAC + MMF +/- other(s)          | 285 | Reference        |         |
| TAC + MTX +/- other(s)          | 723 | 0.65 (0.52-0.80) | < 0.001 |
| TAC +/- Others (not MMF or MTX) | 147 | 0.43 (0.29-0.62) | < 0.001 |
| CSA + MMF +/- other(s)          | 101 | 1.41 (1.02-1.96) | 0.04    |

|                                     | <b>N</b> | <b>HR (95% CI)</b> | <b>p-value</b> |
|-------------------------------------|----------|--------------------|----------------|
| CSA + MTX +- other(s)               | 65       | 0.59 (0.37-0.93)   | 0.02           |
| CSA +/- Others (not MMF or MTX)     | 25       | 0.81 (0.43-1.53)   | 0.52           |
| Donor                               |          |                    | < 0.001        |
| HLA-identical sibling (8/8)         | 365      | Reference          |                |
| Other related                       | 31       | 1.05 (0.51-2.18)   | 0.89           |
| Well-matched unrelated (8/8)        | 750      | 1.60 (1.26-2.02)   | < 0.001        |
| Partially-matched unrelated (7/8)   | 209      | 2.22 (1.66-2.96)   | < 0.001        |
| Mismatched unrelated ( $\leq 6/8$ ) | 23       | 2.68 (1.48-4.87)   | 0.001          |
| In-vivo T-cell depletion            |          |                    | 0.02           |
| No                                  | 735      | Reference          |                |
| Yes                                 | 659      | 0.80 (0.66-0.96)   | 0.02           |
| Year of HCT                         |          |                    | 0.02           |
| 2001-2005                           | 276      | Reference          |                |
| 2006-2010                           | 630      | 1.22 (0.95-1.57)   | 0.12           |
| 2011-2015                           | 488      | 1.46 (1.12-1.90)   | 0.005          |
| <b><u>aGVHD III-IV</u></b>          |          |                    |                |
| Main effect                         |          |                    | 0.003          |
| FB                                  | 784      | Reference          |                |
| FM                                  | 608      | 1.51 (1.15-1.99)   | 0.003          |
| GVHD prophylaxis                    |          |                    | 0.002          |
| TAC + MMF +- other(s)               | 284      | Reference          |                |
| TAC + MTX +- other(s)               | 723      | 0.54 (0.40-0.75)   | < 0.001        |
| TAC +/- Others (not MMF or MTX)     | 147      | 0.49 (0.29-0.82)   | 0.007          |
| CSA + MMF +- other(s)               | 101      | 1.04 (0.67-1.63)   | 0.86           |
| CSA + MTX +- other(s)               | 65       | 0.70 (0.38-1.31)   | 0.27           |
| CSA +/- Others (not MMF or MTX)     | 24       | 0.78 (0.31-1.97)   | 0.60           |
| Donor                               |          |                    | < 0.001        |
| HLA-identical sibling (8/8)         | 365      | Reference          |                |
| Other related                       | 31       | 1.67 (0.66-4.23)   | 0.28           |
| Well-matched unrelated (8/8)        | 749      | 1.41 (0.98-2.01)   | 0.06           |
| Partially-matched unrelated (7/8)   | 208      | 2.50 (1.65-3.79)   | < 0.001        |
| Mismatched unrelated ( $\leq 6/8$ ) | 23       | 3.99 (1.96-8.11)   | < 0.001        |
| In-vivo T-cell depletion            |          |                    | < 0.001        |
| No                                  | 734      | Reference          |                |
| Yes                                 | 658      | 0.62 (0.46-0.82)   | < 0.001        |
| <b><u>cGVHD</u></b>                 |          |                    |                |
| FM vs. FB for ATG=no                |          | 1.38 (1.10-1.72)   | 0.005          |
| FM vs. FB for ATG=yes               |          | 0.79 (0.59-1.04)   | 0.09           |
| GVHD prophylaxis                    |          |                    | < 0.001        |
| TAC + MMF +- other(s)               | 290      | Reference          |                |
| TAC + MTX +- other(s)               | 728      | 0.62 (0.51-0.77)   | < 0.001        |
| TAC +/- Others (not MMF or MTX)     | 147      | 0.53 (0.39-0.73)   | < 0.001        |
| CSA + MMF +- other(s)               | 102      | 0.79 (0.56-1.10)   | 0.16           |

|                                     | <b>N</b> | <b>HR (95% CI)</b> | <b>p-value</b> |
|-------------------------------------|----------|--------------------|----------------|
| CSA + MTX +- other(s)               | 66       | 0.72 (0.48-1.08)   | 0.12           |
| CSA +/- Others (not MMF or MTX)     | 25       | 0.49 (0.25-0.94)   | 0.03           |
| In-vivo T-cell depletion            |          |                    | < 0.001        |
| No                                  | 741      | Reference          |                |
| Yes                                 | 666      | 0.65 (0.51-0.81)   | < 0.001        |
| Donor                               |          |                    | < 0.001        |
| HLA-identical sibling (8/8)         | 370      | Reference          |                |
| Other related                       | 31       | 2.07 (1.23-3.48)   | 0.006          |
| Well-matched unrelated (8/8)        | 758      | 1.88 (1.51-2.34)   | < 0.001        |
| Partially-matched unrelated (7/8)   | 209      | 2.69 (2.03-3.56)   | < 0.001        |
| Mismatched unrelated ( $\leq 6/8$ ) | 23       | 1.61 (0.74-3.49)   | 0.23           |
| Graft type                          |          |                    | 0.002          |
| BM                                  | 189      | Reference          |                |
| PB                                  | 1218     | 1.54 (1.17-2.02)   | 0.002          |
| D-R CMV status                      |          |                    | 0.02           |
| +/+                                 | 404      | Reference          |                |
| +/-                                 | 140      | 0.72 (0.53-0.98)   | 0.04           |
| -/+                                 | 522      | 0.81 (0.66-1.00)   | 0.05           |
| -/-                                 | 296      | 1.08 (0.87-1.35)   | 0.48           |
| Missing                             | 45       | 0.85 (0.50-1.43)   | 0.53           |
| Year of HCT                         |          |                    | 0.03           |
| 2001-2005                           | 278      | Reference          |                |
| 2006-2010                           | 636      | 0.87 (0.69-1.09)   | 0.23           |
| 2011-2015                           | 493      | 0.72 (0.56-0.93)   | 0.01           |

Table S4.

|                                    | N   | HR (95% CI)      | p-value |
|------------------------------------|-----|------------------|---------|
| <b>OS</b>                          |     |                  |         |
| FM vs. FB $\leq$ 3 months          |     | 2.70 (1.80-4.07) | < 0.001 |
| FM vs. FB >3 months                |     | 0.81 (0.68-0.95) | 0.01    |
| Age                                |     |                  | < 0.001 |
| 18-39                              | 91  | Reference        |         |
| 40-59                              | 419 | 1.66 (1.21-2.29) | 0.002   |
| 60-69                              | 482 | 1.95 (1.42-2.67) | < 0.001 |
| $\geq$ 70                          | 50  | 2.64 (1.72-4.07) | < 0.001 |
| KPS                                |     |                  | 0.01    |
| <90                                | 415 | Reference        |         |
| $\geq$ 90                          | 584 | 0.79 (0.68-0.92) | 0.003   |
| Secondary/t-AML                    |     |                  | 0.06    |
| No                                 | 900 | Reference        |         |
| Yes                                | 126 | 1.27 (1.02-1.57) | 0.03    |
| Cytogenetics                       |     |                  | < 0.001 |
| Favorable                          | 67  | Reference        |         |
| Intermediate                       | 572 | 1.49 (1.03-2.15) | 0.03    |
| Poor                               | 328 | 2.13 (1.46-3.12) | < 0.001 |
| Disease status                     |     |                  | 0.15    |
| CR1                                | 769 | Reference        |         |
| $\geq$ CR2                         | 273 | 1.14 (0.95-1.36) | 0.15    |
| Donor                              |     |                  | 0.06    |
| HLA-identical sibling (8/8)        | 294 | Reference        |         |
| Other related                      | 25  | 0.82 (0.48-1.40) | 0.47    |
| Well-matched unrelated (8/8)       | 555 | 1.13 (0.95-1.35) | 0.16    |
| Partially-matched unrelated (7/8)  | 145 | 1.43 (1.13-1.81) | 0.003   |
| Mismatched unrelated ( $\leq$ 6/8) | 12  | 1.24 (0.65-2.36) | 0.52    |
| <b>LFS</b>                         |     |                  |         |
| Main effect                        |     |                  | 0.06    |
| FB                                 | 646 | Reference        |         |
| FM                                 | 390 | 0.87 (0.75-1.01) | 0.06    |
| KPS                                |     |                  | 0.02    |
| <90                                | 413 | Reference        |         |
| $\geq$ 90                          | 580 | 0.81 (0.70-0.94) | 0.006   |
| Secondary/t-AML                    |     |                  | 0.03    |
| No                                 | 896 | Reference        |         |
| Yes                                | 124 | 1.25 (1.01-1.55) | 0.04    |
| Cytogenetics                       |     |                  | < 0.001 |
| Favorable                          | 67  | Reference        |         |
| Intermediate                       | 569 | 1.44 (1.03-2.01) | 0.03    |
| Poor                               | 325 | 2.09 (1.48-2.97) | < 0.001 |

|                                   | N   | HR (95% CI)      | p-value |
|-----------------------------------|-----|------------------|---------|
| Disease status                    |     |                  | 0.02    |
| CR1                               | 764 | Reference        |         |
| ≥CR2                              | 272 | 1.22 (1.03-1.44) | 0.02    |
| Donor                             |     |                  | 0.20    |
| HLA-identical sibling (8/8)       | 293 | Reference        |         |
| Other related                     | 25  | 0.82 (0.49-1.37) | 0.46    |
| Well-matched unrelated (8/8)      | 553 | 1.14 (0.96-1.35) | 0.14    |
| Partially-matched unrelated (7/8) | 142 | 1.28 (1.01-1.62) | 0.04    |
| Mismatched unrelated (≤6/8)       | 12  | 1.52 (0.82-2.81) | 0.18    |
| <b>Relapse</b>                    |     |                  |         |
| Main effect                       |     |                  | < 0.001 |
| FB                                | 646 | Reference        |         |
| FM                                | 390 | 0.60 (0.49-0.73) | < 0.001 |
| Age                               |     |                  | 0.19    |
| 18-39                             | 91  | Reference        |         |
| 40-59                             | 417 | 1.29 (0.92-1.80) | 0.14    |
| 60-69                             | 478 | 1.07 (0.76-1.50) | 0.71    |
| ≥70                               | 50  | 1.12 (0.65-1.92) | 0.69    |
| KPS                               |     |                  | 0.03    |
| <90                               | 413 | Reference        |         |
| ≥90                               | 580 | 0.80 (0.66-0.96) | 0.01    |
| Secondary/t-AML                   |     |                  | 0.20    |
| No                                | 896 | Reference        |         |
| Yes                               | 124 | 1.24 (0.95-1.62) | 0.11    |
| Cytogenetics                      |     |                  | < 0.001 |
| Favorable                         | 67  | Reference        |         |
| Intermediate                      | 569 | 1.64 (1.07-2.53) | 0.02    |
| Poor                              | 325 | 2.68 (1.71-4.21) | < 0.001 |
| Disease status                    |     |                  | < 0.001 |
| CR1                               | 764 | Reference        |         |
| ≥CR2                              | 272 | 1.50 (1.22-1.84) | < 0.001 |
| Donor                             |     |                  | 0.10    |
| HLA-identical sibling (8/8)       | 293 | Reference        |         |
| Other related                     | 25  | 0.49 (0.23-1.04) | 0.06    |
| Well-matched unrelated (8/8)      | 553 | 0.93 (0.76-1.14) | 0.50    |
| Partially-matched unrelated (7/8) | 142 | 0.69 (0.50-0.96) | 0.03    |
| Mismatched unrelated (≤6/8)       | 12  | 1.04 (0.45-2.39) | 0.93    |
| <b>NRM</b>                        |     |                  |         |
| FM vs. FB ≤3 months               |     | 5.09 (2.83-9.14) | < 0.001 |
| FM vs. FB >3 months               |     | 1.17 (0.88-1.57) | 0.28    |
| Age                               |     |                  | < 0.001 |
| 18-39                             | 91  | Reference        |         |

|                                   | <b>N</b> | <b>HR (95% CI)</b> | <b>p-value</b> |
|-----------------------------------|----------|--------------------|----------------|
| 40-59                             | 417      | 1.98 (1.14-3.46)   | 0.02           |
| 60-69                             | 478      | 2.46 (1.42-4.27)   | 0.001          |
| ≥70                               | 50       | 4.82 (2.43-9.58)   | < 0.001        |
| Disease status                    |          |                    | 0.30           |
| CR1                               | 764      | Reference          |                |
| ≥CR2                              | 272      | 0.86 (0.64-1.15)   | 0.30           |
| Donor                             |          |                    | < 0.001        |
| HLA-identical sibling (8/8)       | 293      | Reference          |                |
| Other related                     | 25       | 1.65 (0.77-3.53)   | 0.19           |
| Well-matched unrelated (8/8)      | 553      | 2.24 (1.57-3.20)   | < 0.001        |
| Partially-matched unrelated (7/8) | 142      | 3.96 (2.62-5.99)   | < 0.001        |
| Mismatched unrelated (≤6/8)       | 12       | 2.72 (1.01-7.31)   | 0.05           |
| Year of HCT                       |          |                    | 0.08           |
| 2001-2005                         | 170      | Reference          |                |
| 2006-2010                         | 478      | 1.17 (0.80-1.69)   | 0.42           |
| 2011-2015                         | 388      | 1.49 (1.00-2.21)   | 0.05           |
| GVHD prophylaxis                  |          |                    | 0.03           |
| TAC-based + MMF                   | 206      | Reference          |                |
| TAC-based + MTX                   | 558      | 0.89 (0.66-1.22)   | 0.48           |
| TAC +/- Others (not MMF or MTX)   | 102      | 0.72 (0.44-1.18)   | 0.19           |
| CSA-based + MMF                   | 64       | 1.36 (0.85-2.20)   | 0.20           |
| CSA-based + MTX                   | 51       | 0.91 (0.51-1.62)   | 0.74           |
| CSA +/- Others (not MMF or MTX)   | 19       | 1.02 (0.39-2.63)   | 0.97           |
| D-R sex match                     |          |                    | 0.002          |
| M-M                               | 390      | Reference          |                |
| M-F                               | 272      | 0.78 (0.56-1.08)   | 0.14           |
| F-M                               | 202      | 1.53 (1.13-2.08)   | 0.006          |
| F-F                               | 170      | 0.91 (0.63-1.31)   | 0.61           |
| In-vivo T-cell depletion          |          |                    | 0.02           |
| No                                | 544      | Reference          |                |
| Yes                               | 492      | 0.74 (0.57-0.96)   | 0.02           |
| <b>aGVHD II-IV</b>                |          |                    |                |
| Main effect                       |          |                    | 0.06           |
| FB                                | 641      | Reference          |                |
| FM                                | 388      | 1.24 (0.99-1.55)   | 0.06           |
| GVHD prophylaxis                  |          |                    | < 0.001        |
| TAC + MMF +/- other(s)            | 204      | Reference          |                |
| TAC + MTX +/- other(s)            | 556      | 0.62 (0.48-0.81)   | < 0.001        |
| TAC +/- Others (not MMF or MTX)   | 102      | 0.48 (0.31-0.74)   | 0.001          |
| CSA + MMF +/- other(s)            | 64       | 1.77 (1.20-2.60)   | 0.004          |
| CSA + MTX +/- other(s)            | 50       | 0.67 (0.39-1.13)   | 0.13           |
| CSA +/- Others (not MMF or MTX)   | 19       | 0.96 (0.47-1.94)   | 0.90           |
| Donor                             |          |                    | 0.002          |

|                                     | <b>N</b> | <b>HR (95% CI)</b> | <b>p-value</b> |
|-------------------------------------|----------|--------------------|----------------|
| HLA-identical sibling (8/8)         | 289      | Reference          |                |
| Other related                       | 25       | 1.06 (0.48-2.34)   | 0.88           |
| Well-matched unrelated (8/8)        | 548      | 1.42 (1.09-1.85)   | 0.010          |
| Partially-matched unrelated (7/8)   | 144      | 1.98 (1.41-2.78)   | < 0.001        |
| Mismatched unrelated ( $\leq 6/8$ ) | 12       | 2.62 (1.17-5.88)   | 0.02           |
| In-vivo T-cell depletion            |          |                    | 0.07           |
| No                                  | 542      | Reference          |                |
| Yes                                 | 487      | 0.81 (0.65-1.01)   | 0.07           |
| Year of HCT                         |          |                    | 0.05           |
| 2001-2005                           | 171      | Reference          |                |
| 2006-2010                           | 476      | 1.22 (0.90-1.67)   | 0.20           |
| 2011-2015                           | 382      | 1.48 (1.07-2.05)   | 0.02           |
| <b>aGVHD III-IV</b>                 |          |                    |                |
| Main effect                         |          |                    | 0.008          |
| FB                                  | 641      | Reference          |                |
| FM                                  | 387      | 1.56 (1.12-2.17)   | 0.008          |
| GVHD prophylaxis                    |          |                    | 0.05           |
| TAC + MMF +- other(s)               | 204      | Reference          |                |
| TAC + MTX +- other(s)               | 556      | 0.60 (0.41-0.89)   | 0.01           |
| TAC +/- Others (not MMF or MTX)     | 102      | 0.54 (0.29-1.01)   | 0.06           |
| CSA + MMF +- other(s)               | 64       | 1.25 (0.72-2.18)   | 0.42           |
| CSA + MTX +- other(s)               | 50       | 0.57 (0.25-1.28)   | 0.18           |
| CSA +/- Others (not MMF or MTX)     | 18       | 0.64 (0.19-2.10)   | 0.46           |
| Donor                               |          |                    | 0.05           |
| HLA-identical sibling (8/8)         | 289      | Reference          |                |
| Other related                       | 25       | 2.08 (0.80-5.43)   | 0.13           |
| Well-matched unrelated (8/8)        | 548      | 1.23 (0.82-1.83)   | 0.32           |
| Partially-matched unrelated (7/8)   | 143      | 1.81 (1.10-2.97)   | 0.02           |
| Mismatched unrelated ( $\leq 6/8$ ) | 12       | 3.36 (1.28-8.87)   | 0.01           |
| In-vivo T-cell depletion            |          |                    | 0.007          |
| No                                  | 542      | Reference          |                |
| Yes                                 | 486      | 0.63 (0.45-0.88)   | 0.007          |
| <b>cGVHD</b>                        |          |                    |                |
| Main effect                         |          |                    | 0.42           |
| FB                                  | 647      | Reference          |                |
| FM                                  | 390      | 1.09 (0.89-1.33)   | 0.42           |
| GVHD prophylaxis                    |          |                    | < 0.001        |
| TAC + MMF +- other(s)               | 208      | Reference          |                |
| TAC + MTX +- other(s)               | 557      | 0.59 (0.46-0.74)   | < 0.001        |
| TAC +/- Others (not MMF or MTX)     | 102      | 0.59 (0.42-0.84)   | 0.003          |
| CSA + MMF +- other(s)               | 65       | 0.91 (0.62-1.35)   | 0.64           |
| CSA + MTX +- other(s)               | 51       | 0.66 (0.42-1.04)   | 0.07           |
| CSA +/- Others (not MMF or MTX)     | 19       | 0.39 (0.19-0.80)   | 0.010          |

|                                                    | <b>N</b> | <b>HR (95% CI)</b> | <b>p-value</b> |
|----------------------------------------------------|----------|--------------------|----------------|
| <b>In-vivo T-cell depletion (ATG/ Alemtuzumab)</b> |          |                    | < 0.001        |
| No                                                 | 546      | Reference          |                |
| Yes                                                | 491      | 0.52 (0.43-0.64)   | < 0.001        |
| <b>Donor</b>                                       |          |                    |                |
| HLA-identical sibling (8/8)                        | 293      | Reference          |                |
| Other related                                      | 25       | 1.60 (0.90-2.86)   | 0.11           |
| Well-matched unrelated (8/8)                       | 552      | 1.80 (1.41-2.31)   | < 0.001        |
| Partially-matched unrelated (7/8)                  | 144      | 2.61 (1.91-3.57)   | < 0.001        |
| Mismatched unrelated ( $\leq$ 6/8)                 | 12       | 1.62 (0.69-3.77)   | 0.27           |
| <b>Graft type</b>                                  |          |                    | 0.003          |
| BM                                                 | 128      | Reference          |                |
| PB                                                 | 909      | 1.63 (1.19-2.24)   | 0.003          |
| <b>D-R CMV status</b>                              |          |                    | 0.04           |
| +/+                                                | 303      | Reference          |                |
| +/-                                                | 109      | 0.77 (0.55-1.07)   | 0.12           |
| -/+                                                | 372      | 0.83 (0.66-1.05)   | 0.12           |
| -/-                                                | 223      | 1.15 (0.90-1.48)   | 0.27           |
| <b>Year of HCT</b>                                 |          |                    | 0.02           |
| 2001-2005                                          | 172      | Reference          |                |
| 2006-2010                                          | 480      | 0.81 (0.62-1.05)   | 0.11           |
| 2011-2015                                          | 385      | 0.67 (0.50-0.89)   | 0.006          |

Table S5.

|                                   | N   | HR (95% CI)      | p-value |
|-----------------------------------|-----|------------------|---------|
| <b>OS</b>                         |     |                  |         |
| FM vs. FB ≤3 months               |     | 2.81 (1.66-4.75) | < 0.001 |
| FM vs. FB >3 months               |     | 0.81 (0.64-1.02) | 0.07    |
| HCT-CI group                      |     |                  | 0.23    |
| 0                                 | 149 | Reference        |         |
| 1                                 | 109 | 1.26 (0.93-1.72) | 0.13    |
| 2                                 | 74  | 1.24 (0.87-1.78) | 0.24    |
| 3+                                | 317 | 1.32 (1.01-1.72) | 0.04*   |
| Age                               |     |                  | 0.001   |
| 18-39                             | 43  | Reference        |         |
| 40-59                             | 234 | 2.17 (1.32-3.55) | 0.002   |
| 60-69                             | 334 | 2.07 (1.27-3.38) | 0.004   |
| ≥70                               | 38  | 3.34 (1.83-6.08) | < 0.001 |
| KPS                               |     |                  | 0.002   |
| <90                               | 307 | Reference        |         |
| ≥90                               | 336 | 0.71 (0.58-0.86) | < 0.001 |
| Secondary/t-AML                   |     |                  | 0.35    |
| No                                | 573 | Reference        |         |
| Yes                               | 67  | 1.14 (0.82-1.56) | 0.44    |
| Cytogenetics                      |     |                  | 0.004   |
| Favorable                         | 38  | Reference        |         |
| Intermediate                      | 357 | 1.46 (0.88-2.41) | 0.14    |
| Poor                              | 230 | 2.01 (1.20-3.36) | 0.008   |
| Disease status                    |     |                  | 0.61    |
| CR1                               | 526 | Reference        |         |
| ≥CR2                              | 123 | 1.07 (0.83-1.39) | 0.61    |
| Donor                             |     |                  | 0.29    |
| HLA-identical sibling (8/8)       | 233 | Reference        |         |
| Well-matched unrelated (8/8)      | 314 | 1.19 (0.96-1.48) | 0.11    |
| Partially-matched unrelated (7/8) | 69  | 1.21 (0.88-1.68) | 0.24    |
| Mismatched unrelated (≤6/8)       | 3   | 0.65 (0.20-2.13) | 0.48    |
| <b>LFS</b>                        |     |                  |         |
| Main effect                       |     |                  | 0.45    |
| FB                                | 439 | Reference        |         |
| FM                                | 208 | 0.93 (0.76-1.13) | 0.45    |
| HCT-CI group                      |     |                  | 0.35    |
| 0                                 | 149 | Reference        |         |
| 1                                 | 109 | 1.19 (0.88-1.60) | 0.25    |
| 2                                 | 74  | 1.35 (0.96-1.90) | 0.08    |
| 3+                                | 315 | 1.16 (0.90-1.50) | 0.24    |

|                                   | N   | HR (95% CI)      | p-value |
|-----------------------------------|-----|------------------|---------|
| KPS                               |     |                  | 0.004   |
| <90                               | 306 | Reference        |         |
| ≥90                               | 335 | 0.73 (0.61-0.88) | 0.001   |
| Secondary/t-AML                   |     |                  | 0.39    |
| No                                | 572 | Reference        |         |
| Yes                               | 66  | 1.16 (0.85-1.59) | 0.34    |
| Cytogenetics                      |     |                  | 0.002   |
| Favorable                         | 38  | Reference        |         |
| Intermediate                      | 357 | 1.45 (0.92-2.28) | 0.11    |
| Poor                              | 228 | 2.00 (1.26-3.17) | 0.003   |
| Disease status                    |     |                  | 0.11    |
| CR1                               | 524 | Reference        |         |
| ≥CR2                              | 123 | 1.21 (0.95-1.54) | 0.11    |
| Donor                             |     |                  | 0.53    |
| HLA-identical sibling             | 232 | Reference        |         |
| Well-matched unrelated (8/8)      | 314 | 1.16 (0.94-1.42) | 0.16    |
| Partially-matched unrelated (7/8) | 68  | 1.06 (0.77-1.45) | 0.74    |
| Mismatched unrelated (≤6/8)       | 3   | 0.97 (0.31-3.05) | 0.95    |
| <b>Relapse</b>                    |     |                  |         |
| Main effect                       |     |                  | < 0.001 |
| FB                                | 439 | Reference        |         |
| FM                                | 208 | 0.53 (0.40-0.71) | < 0.001 |
| HCT-CI group                      |     |                  | 0.19    |
| 0                                 | 149 | Reference        |         |
| 1                                 | 109 | 1.16 (0.81-1.67) | 0.43    |
| 2                                 | 74  | 1.44 (0.95-2.17) | 0.08    |
| 3+                                | 315 | 0.97 (0.71-1.34) | 0.86    |
| Age                               |     |                  | 0.05    |
| 18-39                             | 43  | Reference        |         |
| 40-59                             | 233 | 1.76 (1.04-2.98) | 0.04    |
| 60-69                             | 333 | 1.32 (0.78-2.23) | 0.30    |
| ≥70                               | 38  | 1.49 (0.71-3.10) | 0.29    |
| KPS                               |     |                  | 0.009   |
| <90                               | 306 | Reference        |         |
| ≥90                               | 335 | 0.69 (0.55-0.88) | 0.003   |
| Secondary/t-AML                   |     |                  | 0.50    |
| No                                | 572 | Reference        |         |
| Yes                               | 66  | 1.20 (0.81-1.78) | 0.37    |
| Missing                           | 9   | 0.60 (0.15-2.46) | 0.48    |
| Cytogenetics                      |     |                  | < 0.001 |
| Favorable                         | 38  | Reference        |         |
| Intermediate                      | 357 | 1.90 (1.01-3.58) | 0.05    |
| Poor                              | 228 | 2.87 (1.51-5.48) | 0.001   |

|                                   | <b>N</b> | <b>HR (95% CI)</b> | <b>p-value</b> |
|-----------------------------------|----------|--------------------|----------------|
| Missing                           | 24       | 2.23 (0.95-5.25)   | 0.07           |
| <b>Disease status</b>             |          |                    | 0.03           |
| CR1                               | 524      | Reference          |                |
| ≥CR2                              | 123      | 1.41 (1.04-1.90)   | 0.03           |
| <b>Donor</b>                      |          |                    | 0.06           |
| HLA-identical sibling (8/8)       | 232      | Reference          |                |
| Well-matched unrelated (8/8)      | 314      | 0.90 (0.70-1.16)   | 0.42           |
| Partially-matched unrelated (7/8) | 68       | 0.53 (0.33-0.86)   | 0.009          |
| Mismatched unrelated (≤6/8)       | 3        | 0.38 (0.05-2.84)   | 0.35           |
| <b>NRM</b>                        |          |                    |                |
| FM vs. FB ≤3 months               |          | 4.60 (2.26-9.37)   | < 0.001        |
| FM vs. FB >3 months               |          | 1.41 (0.96-2.07)   | 0.08           |
|                                   |          |                    | 0.02           |
| <b>HCT-CI group</b>               |          |                    |                |
| 0                                 | 149      | Reference          |                |
| 1                                 | 109      | 1.11 (0.65-1.88)   | 0.71           |
| 2                                 | 74       | 1.29 (0.70-2.38)   | 0.41           |
| 3+                                | 315      | 1.80 (1.19-2.72)   | 0.005          |
| <b>Age</b>                        |          |                    | 0.001          |
| 18-39                             | 43       | Reference          |                |
| 40-59                             | 233      | 2.76 (1.16-6.59)   | 0.02           |
| 60-69                             | 333      | 2.90 (1.25-6.76)   | 0.01           |
| ≥70                               | 38       | 6.55 (2.46-17.5)   | < 0.001        |
| <b>Disease status</b>             |          |                    | 0.83           |
| CR1                               | 524      | Reference          |                |
| ≥CR2                              | 123      | 0.95 (0.63-1.45)   | 0.83           |
| <b>Donor</b>                      |          |                    | < 0.001        |
| HLA-identical sibling (8/8)       | 232      | Reference          |                |
| Well-matched unrelated (8/8)      | 314      | 2.47 (1.60-3.80)   | < 0.001        |
| Partially-matched unrelated (7/8) | 68       | 3.63 (2.10-6.27)   | < 0.001        |
| Mismatched unrelated (≤6/8)       | 3        | 1.75 (0.38-8.02)   | 0.47           |
| <b>Year of HCT</b>                |          |                    | 0.05           |
| 2006-2010                         | 267      | Reference          |                |
| 2011-2015                         | 380      | 1.41 (1.00-1.97)   | 0.05           |
| <b>GVHD prophylaxis</b>           |          |                    | 0.02           |
| TAC-based + MMF                   | 109      | Reference          |                |
| TAC-based + MTX                   | 388      | 1.15 (0.74-1.79)   | 0.54           |
| CSA-based + MMF                   | 24       | 2.06 (1.00-4.23)   | 0.05           |
| CSA-based + MTX                   | 24       | 1.14 (0.48-2.70)   | 0.77           |
| <b>D-R sex match</b>              |          |                    | 0.09           |
| M-M                               | 239      | Reference          |                |
| M-F                               | 175      | 0.83 (0.55-1.25)   | 0.36           |
| F-M                               | 132      | 1.39 (0.92-2.10)   | 0.11           |

|                 | <b>N</b> | <b>HR (95% CI)</b> | <b>p-value</b> |
|-----------------|----------|--------------------|----------------|
| F-F             | 100      | 0.79 (0.47-1.32)   | 0.37           |
| ATG/alemtuzumab |          |                    | 0.02           |
| Yes             | 275      | Reference          |                |
| No              | 372      | 1.55 (1.09-2.20)   | 0.02           |

Table S6.

|            | FM vs. FB<br>(Full; sib/WM –URD cohort)<br>HR, (95% CI) | FM vs. FB<br>(CR; sib/WM –URD cohort)<br>HR, (95% CI) |
|------------|---------------------------------------------------------|-------------------------------------------------------|
| OS         |                                                         |                                                       |
| ≤ 3 months | 1.47 (1.04-2.07), p=0.03                                | 2.19 (1.23-3.92), p=0.008                             |
| > 3 months | 0.82 (0.70-0.97), p=0.02                                | 0.80 (0.64-0.99), p=0.04                              |
| LFS        | 0.81 (0.71-0.93), p=0.003                               | 0.81 (0.67-0.98), p=0.03                              |
| NRM        |                                                         |                                                       |
| ≤ 3 months | 3.71 (2.19-6.28), p<0.001                               | 4.54 (2.06-9.99), p<0.001                             |
| > 3 months | 1.25 (0.92-1.68), p=0.15                                | 1.53 (1.05-2.24), p=0.03                              |
| Relapse    | 0.61 (0.52-0.73), p<0.001                               | 0.51 (0.39-0.67), p<0.001                             |
| GRFS       | 0.97 (0.85-1.11), p=0.71                                | 0.97 (0.81-1.18), p=0.79                              |

\* Significant *p*-value;

HR: Hazard ratio; CR: complete remission; OS: overall survival; LFS: Leukemia-free survival; NRM: non-relapse mortality; GRFS: GVHD and relapse-free survival.

Table S7.

| Outcomes | n   | FB (n = 791)     |     | FM (n = 622)     |         |
|----------|-----|------------------|-----|------------------|---------|
|          |     | Prob,% (95% CI)  | n   | Prob,% (95% CI)  | P Value |
| ANC      | 789 |                  | 616 |                  | 0.014   |
| 1 months | 5   | 98.5 (97.5-99.2) | 16  | 94.1 (92.2-95.9) | <0.001  |
| 2 months | 2   | 98.9 (98.0-99.5) | 4   | 95.4 (93.7-97.0) | <0.001  |
| 100-day  | 2   | 98.9 (98.0-99.5) | 1   | 95.6 (93.8-97.1) | <0.001  |
| Platelet | 790 |                  | 616 |                  | <0.001  |
| 1 months | 72  | 89.9 (87.7-91.9) | 125 | 75.0 (71.5-78.3) | <0.001  |
| 2 months | 30  | 93.6 (91.8-95.2) | 39  | 84.9 (81.9-87.6) | <0.001  |
| 100-day  | 17  | 94.0 (92.2-95.6) | 23  | 86.2 (83.3-88.8) | <0.001  |

Table S8.

|                          | FM       | FB       |
|--------------------------|----------|----------|
| Number of patients       | 622      | 791      |
| Number of death          | 465 (75) | 589 (74) |
| Cause of death           |          |          |
| Primary disease          | 188 (40) | 348 (59) |
| Graft failure            | 2 (<1)   | 2 (<1)   |
| GVHD                     | 55 (12)  | 55 (9)   |
| Infection                | 80 (17)  | 46 (8)   |
| Interstitial Pneumonitis | 9 (2)    | 10 (2)   |
| ARDS                     | 4 (<1)   | 7 (1)    |
| Organ failure            | 64 (14)  | 41 (7)   |
| Secondary malignancy     | 5 (1)    | 15 (3)   |
| Hemorrhage               | 7 (2)    | 8 (1)    |
| Accident/suicide         | 1 (<1)   | 1 (<1)   |
| Vascular                 | 2 (<1)   | 3 (<1)   |
| Other                    | 27 (6)   | 33 (6)   |
| Missing                  | 21 (4)   | 20 (3)   |
